# Supplementary material for: Physicochemical Profile of Antiandrogen Drug Bicalutamide: Solubility, Distribution, Permeability
Source: MDPI journal article supplement (doi:10.3390/pharmaceutics14030674), 2022-03-18
Supplement: s1 [file s1]

## Supplementary Material

### Physicochemical profile of antiandrogen drug bicalutamide:

#### Solubility, distribution, permeability

Tatyana V. Volkova, Olga R. Simonova, Germen L. Perlovich\*

G.A. Krestov Institute of Solution Chemistry RAS, 153045 Ivanovo, Russia.

\*Corresponding author: 1 Akademicheskaya str., 153045 Ivanovo, Russian Federation,

*E-mail: glp@isc-ras.ru*

#### Supplementary materials - content:

|                                                                                                                                                                                                   |       |
|---------------------------------------------------------------------------------------------------------------------------------------------------------------------------------------------------|-------|
| Figure S1. PXRD patterns on BCL calculated, raw and after the solubility experiments.                                                                                                             | S2    |
| Figure S2. DSC curves for BCL raw and after the solubility experiments.                                                                                                                           | S2    |
| Figure S3. Absorption spectra of BCL in water, 1-octanol, n-hexane and ethanol.                                                                                                                   | S3    |
| Figure S4. BCL cumulative amount permeated.                                                                                                                                                       | S3    |
| Table S1. Density of the investigated solvents at different temperatures and pressure p = 0.1 MPa.                                                                                                | S4    |
| Table S2. The group contribution parameters and the associated molar volumes of BCL                                                                                                               | S4    |
| Table S3. Experimental ( $X_2^{\text{exp}}$ ) and calculated ( $X_2^{\text{cal}}$ ) mole fractions solubility of BCL in the selected solvents at different temperatures and pressure p = 100 kPa. | S5    |
| Table S4. The parameters of the modified Apelblat and van't Hoff equations.                                                                                                                       | S5    |
| Table S5. The sublimation thermodynamic parameters taken from [12]                                                                                                                                | S6    |
| Table S6. Thermodynamic functions of BCL solubility and solvation processes in the solvents at the studied temperatures.                                                                          | S7-S8 |

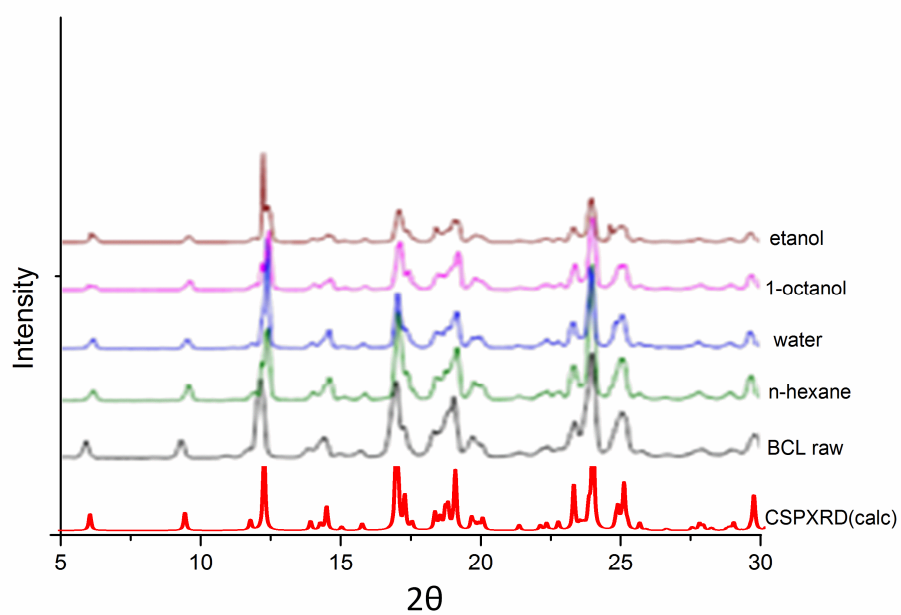

**Figure S1.** PXRD patterns on BCL calculated, raw and after the solubility experiments.

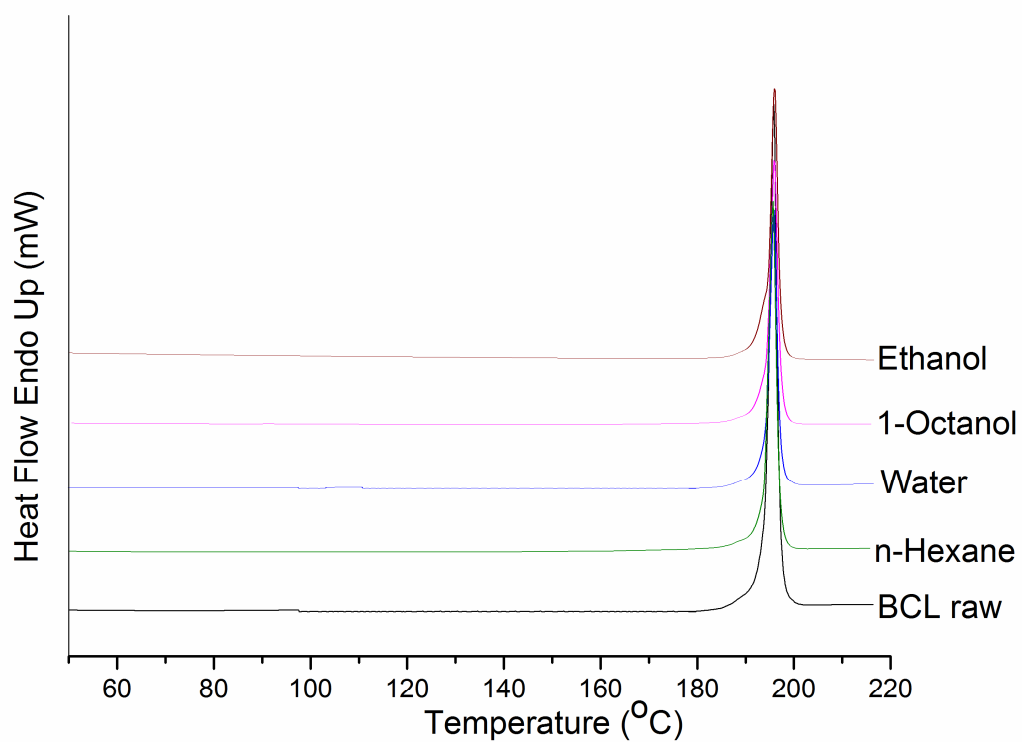

**Figure S2.** DSC curves for BCL raw and after the solubility experiments.

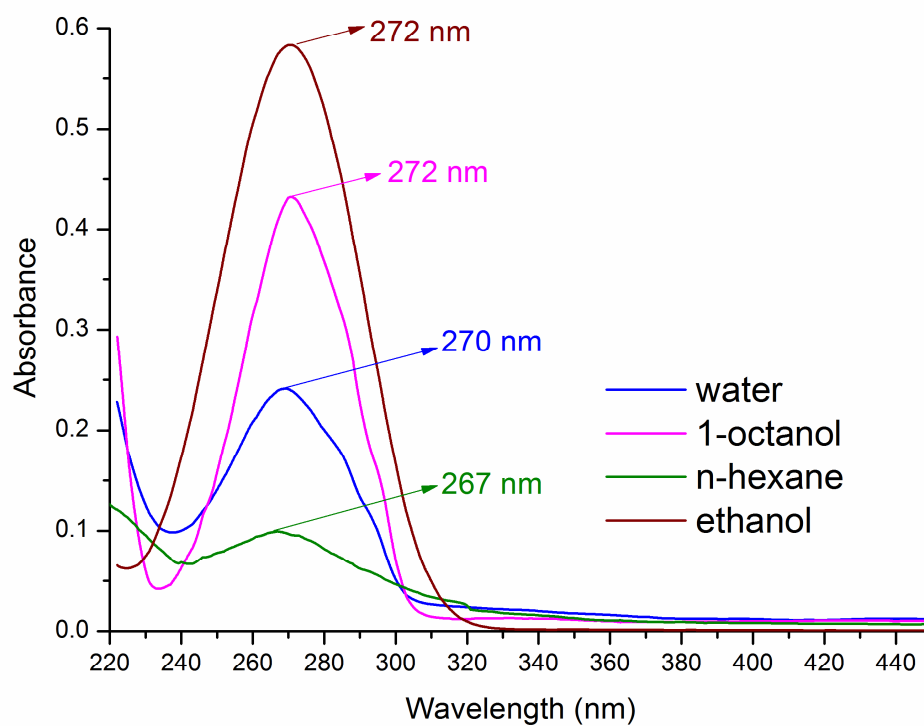

**Figure S3.** Absorption spectra of BCL in water, 1-octanol, n-hexane and ethanol.

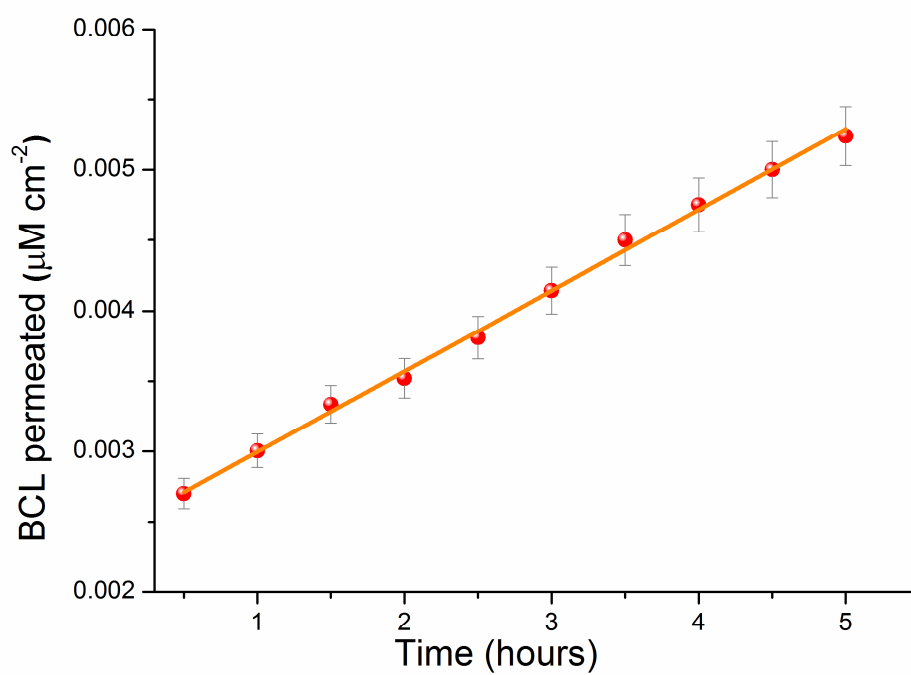

**Figure S4.** BCL cumulative amount permeated.

**Table S1.** Density of the investigated solvents at different temperatures and pressure  $p = 0.1$  MPa.

| Solvent   | $\rho/\text{g}\cdot\text{cm}^{-3}$ |          |          |          |          |          |
|-----------|------------------------------------|----------|----------|----------|----------|----------|
|           | 293.15 K                           | 298.15 K | 303.15 K | 308.15 K | 313.15 K | 318.15 K |
| Water     | 0.9982                             | 0.9968   | 0.9952   | 0.9936   | 0.9921   | -        |
| 1-Octanol | 0.8251                             | 0.8217   | 0.8183   | 0.8148   | 0.8114   | -        |
| Hexane    | 0.6587                             | 0.6543   | 0.6495   | 0.6453   | 0.6432   | 0.6361   |
| Ethanol   | 0.7895                             | 0.7852   | 0.7809   | 0.7766   | 0.7722   | -        |

**Table S2.** The group contribution parameters and the associated molar volumes of BCL

| Functional group   | n | $F_{di}$<br>$((\text{J}/\text{m}^3)^{1/2}\cdot\text{mol}^{-1})$ | $F_{pi}$<br>$((\text{J}/\text{m}^3)^{1/2}\cdot\text{mol}^{-1})$ | $E_{hi}$<br>(J/mol) | $V_i$<br>( $\text{cm}^3/\text{mol}$ ) |
|--------------------|---|-----------------------------------------------------------------|-----------------------------------------------------------------|---------------------|---------------------------------------|
| S-119              |   |                                                                 |                                                                 |                     |                                       |
| -CN                | 1 | 430                                                             | 1100                                                            | 2500                | 24.0                                  |
| -CH <sub>3</sub>   | 1 | 420                                                             | 0                                                               | 0                   | 33.5                                  |
| -CH <sub>2</sub> - | 1 | 270                                                             | 0                                                               | 0                   | 16.1                                  |
| -SO <sub>2</sub>   | 1 | 295.8                                                           | 4361.0                                                          | 200                 | 51.0                                  |
| >C<                | 2 | -140(=-70×2)                                                    | 0                                                               | 0                   | 13.0(=6.5×2)                          |
| -NH                | 1 | 160                                                             | 210                                                             | 3100                | 4.5                                   |
| -OH                | 1 | 210                                                             | 500                                                             | 20000               | 10.0                                  |
| -F                 | 4 | 880(=220×4)                                                     | 0                                                               | 0                   | 72.0(=18.0×4)                         |
| -CO                | 1 | 290                                                             | 770                                                             | 2000                | 10.8                                  |
| phenylene          | 2 | 2540(=1270×2)<br>5355.8                                         | 220(=110×2)<br>7161                                             | 0<br>27800          | 104.8(=52.4×2)<br>339.7               |

**Table S3.** Experimental ( $X_2^{\text{exp}}$ ) and calculated ( $X_2^{\text{cal}}$ ) mole fractions solubility of BCL in the selected solvents at different temperatures and pressure  $p = 100$  kPa.

| $T$ (K)   | $X_2^{\text{exp}}$   | Modified Apelblat equation |            | van't Hoff equation  |            |
|-----------|----------------------|----------------------------|------------|----------------------|------------|
|           |                      | $X_2^{\text{cal}}$         | $^aRD$ (%) | $X_2^{\text{cal}}$   | $^aRD$ (%) |
| Water     |                      |                            |            |                      |            |
| 298.15    | $1.13 \cdot 10^{-7}$ | $1.12 \cdot 10^{-7}$       | 0.19       | $1.15 \cdot 10^{-7}$ | 1.78       |
| 303.15    | $1.47 \cdot 10^{-7}$ | $1.44 \cdot 10^{-7}$       | 2.07       | $1.48 \cdot 10^{-7}$ | 0.31       |
| 308.15    | $1.90 \cdot 10^{-7}$ | $1.84 \cdot 10^{-7}$       | 3.43       | $1.88 \cdot 10^{-7}$ | 0.99       |
| 313.15    | $2.35 \cdot 10^{-7}$ | $2.33 \cdot 10^{-7}$       | 0.53       | $2.39 \cdot 10^{-7}$ | 1.75       |
| 318.15    | $2.97 \cdot 10^{-7}$ | $2.95 \cdot 10^{-7}$       | 0.75       | $3.00 \cdot 10^{-7}$ | 0.98       |
| n-hexane  |                      |                            |            |                      |            |
| 293.15    | $7.40 \cdot 10^{-7}$ | $7.39 \cdot 10^{-7}$       | 0.20       | $7.64 \cdot 10^{-7}$ | 3.19       |
| 298.15    | $1.07 \cdot 10^{-6}$ | $1.07 \cdot 10^{-6}$       | 0.20       | $1.07 \cdot 10^{-6}$ | 0.36       |
| 303.15    | $1.50 \cdot 10^{-6}$ | $1.50 \cdot 10^{-6}$       | 0.32       | $1.49 \cdot 10^{-6}$ | 0.97       |
| 308.15    | $2.04 \cdot 10^{-6}$ | $2.05 \cdot 10^{-6}$       | 0.27       | $2.04 \cdot 10^{-6}$ | 0.15       |
| 313.15    | $2.76 \cdot 10^{-6}$ | $2.74 \cdot 10^{-6}$       | 0.65       | $2.77 \cdot 10^{-6}$ | 0.52       |
| 318.15    | $3.63 \cdot 10^{-6}$ | $3.59 \cdot 10^{-6}$       | 1.23       | $3.73 \cdot 10^{-6}$ | 2.85       |
| 1-octanol |                      |                            |            |                      |            |
| 293.15    | $2.23 \cdot 10^{-4}$ | $2.22 \cdot 10^{-4}$       | 0.86       | $2.25 \cdot 10^{-4}$ | 0.49       |
| 298.15    | $2.57 \cdot 10^{-4}$ | $2.57 \cdot 10^{-4}$       | 0.32       | $2.61 \cdot 10^{-4}$ | 1.27       |
| 303.15    | $2.99 \cdot 10^{-4}$ | $2.96 \cdot 10^{-4}$       | 1.26       | $3.01 \cdot 10^{-4}$ | 0.35       |
| 308.15    | $3.40 \cdot 10^{-4}$ | $3.41 \cdot 10^{-4}$       | 0.19       | $3.46 \cdot 10^{-4}$ | 1.69       |
| 313.15    | $3.95 \cdot 10^{-4}$ | $3.91 \cdot 10^{-4}$       | 0.99       | $3.96 \cdot 10^{-4}$ | 0.19       |
| Ethanol   |                      |                            |            |                      |            |
| 293.15    | $1.15 \cdot 10^{-3}$ | $1.15 \cdot 10^{-3}$       | 0.59       | $1.17 \cdot 10^{-3}$ | 1.95       |
| 298.15    | $1.42 \cdot 10^{-3}$ | $1.39 \cdot 10^{-3}$       | 2.12       | $1.43 \cdot 10^{-3}$ | 0.28       |
| 303.15    | $1.74 \cdot 10^{-3}$ | $1.68 \cdot 10^{-3}$       | 3.59       | $1.73 \cdot 10^{-3}$ | 0.81       |
| 308.15    | $2.11 \cdot 10^{-3}$ | $2.03 \cdot 10^{-3}$       | 3.82       | $2.08 \cdot 10^{-3}$ | 1.22       |
| 313.15    | $2.43 \cdot 10^{-3}$ | $2.45 \cdot 10^{-3}$       | 0.75       | $2.50 \cdot 10^{-3}$ | 2.72       |

$^aRD$  is the relative deviation:  $RD = (X_2^{\text{exp}} - X_2^{\text{cal}}) / X_2^{\text{exp}} \cdot 100\%$ ;

Standard uncertainties:  $u(T) = 0.15$  K and  $u(p) = 3$  kPa;

Relative standard uncertainties for solubility:  $u_r(X_2) = 0.045$  for water and n-hexane;  $u_r(X_2) = 0.04$  for ethanol and 1-octanol.

**Table S4.** The parameters of the modified Apelblat and van't Hoff equations

| Solvents                   | $A$            | $B$               | $C$             | RMSD                | RAD                 |
|----------------------------|----------------|-------------------|-----------------|---------------------|---------------------|
| Modified Apelblat equation |                |                   |                 |                     |                     |
| Water                      | $-80 \pm 66$   | $-864 \pm 3013$   | $11.8 \pm 9.9$  | $3.4 \cdot 10^{-9}$ | $1.4 \cdot 10^{-2}$ |
| n-Hexane                   | $361 \pm 29$   | $-22030 \pm 1354$ | $-52.9 \pm 4.4$ | $2.7 \cdot 10^{-8}$ | $1.9 \cdot 10^{-2}$ |
| 1-Octanol                  | $-44 \pm 25$   | $-609 \pm 1164$   | $6.6 \pm 3.8$   | $2.6 \cdot 10^{-6}$ | $7.2 \cdot 10^{-3}$ |
| Ethanol                    | $-142 \pm 79$  | $3213 \pm 3598$   | $22.0 \pm 11.8$ | $4.8 \cdot 10^{-5}$ | $2.2 \cdot 10^{-2}$ |
| van't Hoff equation        |                |                   |                 |                     |                     |
| Water                      | $-0.9 \pm 0.3$ | $-4425 \pm 77$    |                 | $2.6 \cdot 10^{-9}$ | $1.1 \cdot 10^{-2}$ |
| n-Hexane                   | $6.1 \pm 0.3$  | $-5919 \pm 82$    |                 | $5.3 \cdot 10^{-8}$ | $5.7 \cdot 10^{-2}$ |
| 1-Octanol                  | $0.5 \pm 0.1$  | $-2601 \pm 43$    |                 | $3.1 \cdot 10^{-6}$ | $8.0 \cdot 10^{-3}$ |
| Ethanol                    | $5.1 \pm 0.4$  | $-3481 \pm 114$   |                 | $3.4 \cdot 10^{-5}$ | $1.4 \cdot 10^{-2}$ |

**Table S5.** Melting and sublimation thermodynamic functions of Bicalutamide [12]

|                                                            |                 |
|------------------------------------------------------------|-----------------|
| $T_m^{onset}$ (K)                                          | $465.5 \pm 0.2$ |
| $\Delta H_m$ (kJ·mol <sup>-1</sup> )                       | $49.5 \pm 0.5$  |
| $\Delta S_m$ (J·K <sup>-1</sup> ·mol <sup>-1</sup> )       | $106 \pm 1$     |
| $\Delta G_{sub}^0$ (kJ·mol <sup>-1</sup> )                 | 63.7            |
| $\Delta H_{sub}^T$ (kJ·mol <sup>-1</sup> )                 | $117.1 \pm 0.6$ |
| $\Delta H_{sub}^0$ (kJ·mol <sup>-1</sup> )                 | $124.7 \pm 0.6$ |
| $T\Delta S_{sub}^0$ (kJ·mol <sup>-1</sup> )                | 61.0            |
| $\Delta S_{sub}^0$ (J·K <sup>-1</sup> ·mol <sup>-1</sup> ) | $204.6 \pm 5.0$ |

**Table S6.** Thermodynamic functions of BCL solubility and solvation processes in the solvents at the studied temperatures.

| Temperature (K) | $\Delta G_{sol}^0$<br>(kJ·mol <sup>-1</sup> ) | $\Delta H_{sol}^0$<br>(kJ·mol <sup>-1</sup> ) | $T\Delta S_{sol}^0$<br>(kJ·mol <sup>-1</sup> ) | $\Delta S_{sol}^0$<br>(J·mol <sup>-1</sup> ·K <sup>-1</sup> ) | $-\Delta G_{solv}^0$<br>(kJ·mol <sup>-1</sup> ) | $-\Delta H_{solv}^0$<br>(kJ·mol <sup>-1</sup> ) | $-T\Delta S_{solv}^0$<br>(kJ·mol <sup>-1</sup> ) | $-\Delta S_{solv}^0$<br>(J·mol <sup>-1</sup> ·K <sup>-1</sup> ) | <sup>a</sup> $\zeta_{H\ solv}$<br>(%) | <sup>b</sup> $\zeta_{TS\ solv}$<br>(%) |
|-----------------|-----------------------------------------------|-----------------------------------------------|------------------------------------------------|---------------------------------------------------------------|-------------------------------------------------|-------------------------------------------------|--------------------------------------------------|-----------------------------------------------------------------|---------------------------------------|----------------------------------------|
| Water           |                                               |                                               |                                                |                                                               |                                                 |                                                 |                                                  |                                                                 |                                       |                                        |
| 293.15          | 39.00                                         | 36.8±0.6                                      | -2.20                                          | -7.50±0.3                                                     | 24.70                                           | 87.9                                            | 63.20                                            | 215.59                                                          | 58.17                                 | 41.83                                  |
| 298.15          | 39.00                                         |                                               | -2.20                                          | -7.37±0.3                                                     | 24.70                                           |                                                 | 63.20                                            | 211.97                                                          | 58.17                                 | 41.83                                  |
| 303.15          | 39.00                                         |                                               | -2.20                                          | -7.27±0.3                                                     | 24.70                                           |                                                 | 63.20                                            | 208.48                                                          | 58.17                                 | 41.83                                  |
| 308.15          | 39.11                                         |                                               | -2.31                                          | -7.49±0.3                                                     | 24.59                                           |                                                 | 63.31                                            | 205.45                                                          | 58.13                                 | 41.87                                  |
| 313.15          | 39.13                                         |                                               | -2.33                                          | -7.43±0.3                                                     | 24.57                                           |                                                 | 63.33                                            | 202.24                                                          | 58.12                                 | 41.88                                  |
| 1-Octanol       |                                               |                                               |                                                |                                                               |                                                 |                                                 |                                                  |                                                                 |                                       |                                        |
| 293.15          | 20.49                                         | 21.6±0.4                                      | 1.11                                           | 3.79±3.6                                                      | 43.21                                           | 103.1                                           | 59.89                                            | 204.30                                                          | 63.26                                 | 36.74                                  |
| 298.15          | 20.49                                         |                                               | 1.11                                           | 3.73±3.6                                                      | 43.21                                           |                                                 | 59.89                                            | 200.87                                                          | 63.26                                 | 36.74                                  |
| 303.15          | 20.45                                         |                                               | 1.15                                           | 3.81±3.6                                                      | 43.25                                           |                                                 | 59.85                                            | 197.43                                                          | 63.27                                 | 36.73                                  |
| 308.15          | 20.46                                         |                                               | 1.14                                           | 3.70±3.6                                                      | 43.24                                           |                                                 | 59.86                                            | 194.26                                                          | 63.27                                 | 36.73                                  |
| 313.15          | 20.40                                         |                                               | 1.20                                           | 3.82±3.6                                                      | 43.30                                           |                                                 | 59.80                                            | 190.96                                                          | 63.29                                 | 36.71                                  |
| n-Hexane        |                                               |                                               |                                                |                                                               |                                                 |                                                 |                                                  |                                                                 |                                       |                                        |
| 293.15          | 34.40                                         | 49.2±0.7                                      | 14.80                                          | 50.47±3.4                                                     | 29.30                                           | 75.5                                            | 46.20                                            | 157.60                                                          | 62.04                                 | 37.96                                  |
| 298.15          | 34.20                                         |                                               | 15.02                                          | 50.70±3.4                                                     | 29.52                                           |                                                 | 45.88                                            | 153.88                                                          | 62.20                                 | 37.80                                  |
| 303.15          | 33.80                                         |                                               | 15.40                                          | 50.81±3.4                                                     | 29.90                                           |                                                 | 45.60                                            | 150.42                                                          | 62.35                                 | 37.65                                  |
| 308.15          | 33.56                                         |                                               | 15.64                                          | 50.75±3.4                                                     | 30.14                                           |                                                 | 45.36                                            | 147.20                                                          | 62.47                                 | 37.53                                  |
| 313.15          | 33.33                                         |                                               | 15.87                                          | 50.69±3.4                                                     | 30.37                                           |                                                 | 45.13                                            | 144.2                                                           | 62.59                                 | 37.41                                  |
| 318.15          | 33.13                                         |                                               | 16.07                                          | 50.50±3.4                                                     | 30.57                                           |                                                 | 44.93                                            | 141.22                                                          | 62.69                                 | 37.31                                  |
| Ethanol         |                                               |                                               |                                                |                                                               |                                                 |                                                 |                                                  |                                                                 |                                       |                                        |
| 293.15          | 16.50                                         | 28.9±0.9                                      | 12.40                                          | 42.29±5.1                                                     | 47.20                                           | 95.8                                            | 48.60                                            | 165.79                                                          | 66.34                                 | 33.66                                  |
| 298.15          | 16.20                                         |                                               | 12.65                                          | 42.43±5.1                                                     | 47.45                                           |                                                 | 48.34                                            | 162.17                                                          | 66.46                                 | 33.54                                  |
| 303.15          | 16.01                                         |                                               | 12.89                                          | 42.52±5.1                                                     | 47.69                                           |                                                 | 48.11                                            | 158.70                                                          | 66.57                                 | 33.43                                  |
| 308.15          | 15.78                                         |                                               | 13.12                                          | 42.56±5.1                                                     | 47.92                                           |                                                 | 47.88                                            | 155.38                                                          | 66.68                                 | 33.32                                  |
| 313.15          | 15.67                                         |                                               | 13.23                                          | 42.24±5.1                                                     | 48.03                                           |                                                 | 47.77                                            | 152.55                                                          | 66.73                                 | 33.27                                  |

$$^a \zeta_{H_{solv}} = (|\Delta H_{solv}^0| / (|\Delta H_{solv}^0| + |T\Delta S_{solv}^0|)) \cdot 100\%; \quad ^b \zeta_{TS_{solv}} = (|T\Delta S_{solv}^0| / (|\Delta H_{solv}^0| + |T\Delta S_{solv}^0|)) \cdot 100\%;$$
